# Supplementary material for: Demonstration of a tailorable and PCR-free detection of Enterococcus DNA isolated from soil samples
Source: Royal Society of Chemistry journal article supplement (doi:10.1039/c6ay03309a), 2017-01-01
Supplement: c6ay03309a1.pdf [file c6ay03309a1.pdf]

## Demonstration of a Tailorable and PCR-free Detection of *Enterococcus* DNA Isolated From Soil Samples

Natashya Falcone,<sup>ab</sup> Zhe She<sup>ac</sup>, Chai Chen,<sup>a</sup> Bin Dong<sup>ad</sup>, Daniel Yi<sup>e</sup>, and Heinz-Bernhard Kraatz<sup>abcf\*</sup>

<sup>a</sup>Department of Physical and Environmental Sciences, University of Toronto Scarborough, 1265 Military Trail, Toronto, ON, M1C 1A4, Canada. <sup>b</sup>Department of Chemical Engineering and Applied Chemistry, University of Toronto, 200 College St, Toronto, ON M5S 3E5. <sup>c</sup>Department of Chemistry and Chemical Engineering, Royal Military College of Canada, PO Box 17000, Station Forces, Kingston, ON, K7K 7B4, Canada. <sup>d</sup>Department of Chemistry and Chemical Engineering, School of Chemistry and Biological Engineering, University of Science and Technology Beijing, Beijing, 100083, PR China. <sup>e</sup>Department of Biological Sciences, University of Toronto Scarborough, 1265 Military Trail, Toronto, ON, M1C 1A4, Canada. <sup>f</sup>Department of Chemistry, 80. St. George Street, Toronto, M5S 3H6, Canada.

E-mail: [bernie.kraatz@utoronto.ca](mailto:bernie.kraatz@utoronto.ca); Fax: +1 416-287-7279

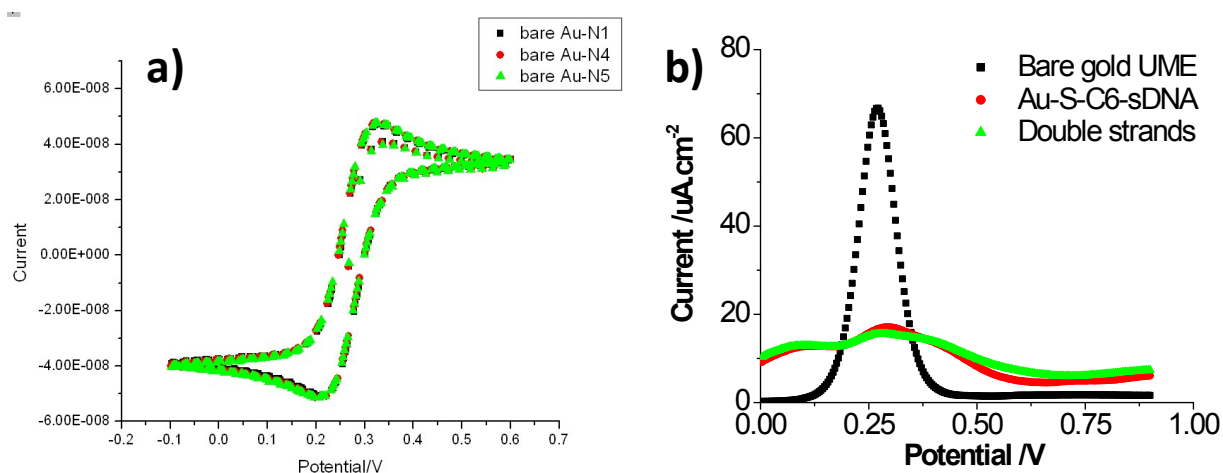

Figure S1. CV (a) characterization of fresh generated bare gold sensor and SWV (b) detection of DNA.

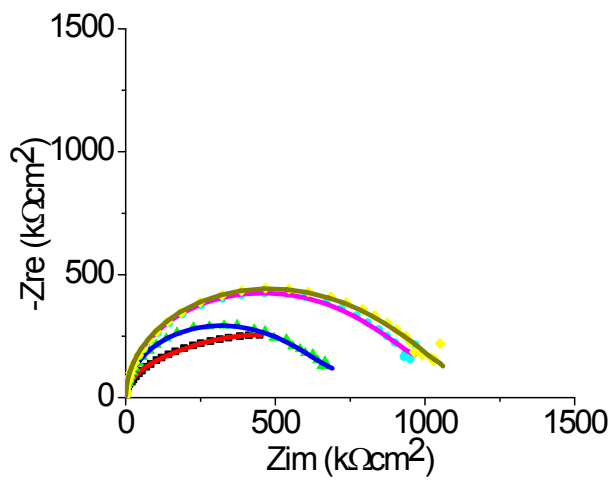

Figure S2. Nyquist plots of DNA films after hybridizing in the target DNA for 0 (Red), 30 (Blue), 90 (Pink) and 120 minutes (dark brown).
